# Supplementary material for: Polymorph- and molecular alignment-dependent lasing behaviors of a cyano-substituted thiophene/phenylene co-oligomer
Source: Royal Society of Chemistry journal article supplement (doi:10.1039/d2tc04151k), 2023-01-01
Supplement: d2tc04151k1.pdf [file d2tc04151k1.pdf]

## Supplementary Information

### Polymorph- and molecular alignment-dependent lasing behaviors of cyano-substituted thiophene/phenylene co-oligomer

Tomomi Jinjyo,<sup>\*a</sup> Hitoshi Mizuno,<sup>\*a</sup> Fumio Sasaki,<sup>b</sup> and Hisao Yanagi<sup>a</sup>

<sup>a</sup>. Graduate School of Science and Technology, Nara Institute of Science and Technology (NAIST), 8916-5 Takayama, Ikoma, Nara 630-0192, Japan

<sup>b</sup>. Research Institute for Advanced Electronics and Photonics, National Institute of Advanced Industrial Science and Technology, Ibaraki 305-8568, Japan

E-mail: [hitoshi352-17@ms.naist.jp](mailto:hitoshi352-17@ms.naist.jp)

S1. Polarized light microscopy observations of BP2T-CN orange-emitting crystals.

The fluorescence micrographs of BP2T-CN orange-emitting crystal is shown in Fig.S1. Figures S1(a) and S1(b)/S1(c) show the non-polarized and polarized fluorescence microscope images, respectively. The luminescence intensity was maximum or minimum when  $115^\circ$ -or  $25^\circ$ -polarized light was irradiated to the crystal. No polycrystalline domains can be seen from the polarized microscopy images. This means that BP2T-CN orange-emitting sample is the single crystal.

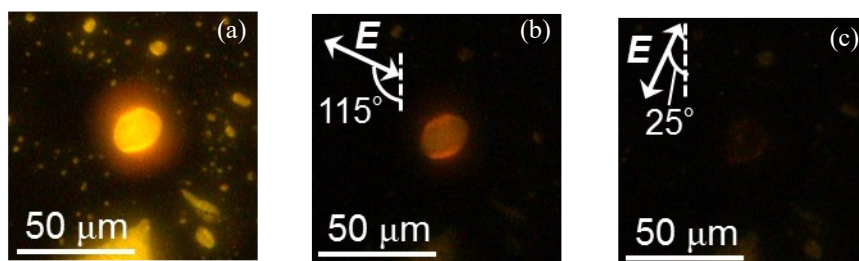

Figure S1. The non-polarized (a) and polarized fluorescence micrographs (b, c) of BP2T-CN orange-emitting crystal.

## S2. X-ray diffraction analysis for orange- and green-emitting crystals.

Molecular structures and crystal structures for orange- and green-emitting crystals are shown in Fig. S2. The crystal structure data was obtained for orange-emitting crystal ( $P2_1$ ,  $a = 18.47 \text{ \AA}$ ,  $b = 7.271 \text{ \AA}$ ,  $c = 18.56 \text{ \AA}$ ,  $\alpha = 90^\circ$ ,  $\beta = 100.57^\circ$ ,  $\gamma = 90^\circ$ ,  $Z = 4$ ) and green-emitting crystals ( $P2_1$ ,  $a = 18.40 \text{ \AA}$ ,  $b = 7.240 \text{ \AA}$ ,  $c = 18.44 \text{ \AA}$ ,  $\alpha = 90^\circ$ ,  $\beta = 100.57^\circ$ ,  $\gamma = 90^\circ$ ,  $Z = 4$ ), respectively. As results of x-ray diffraction measurements, there were no impurities, crystal structure change, and the mixture of amorphous and monoclinic phase crystal for orange- and green-emitting crystals. Therefore, the red-shifting in the PL spectrum of the orange-emitting crystal compared to the green-emitting crystal is attributed to smaller slip angle (angle between two adjacent molecules forming a diagonal pair and (100) plane).

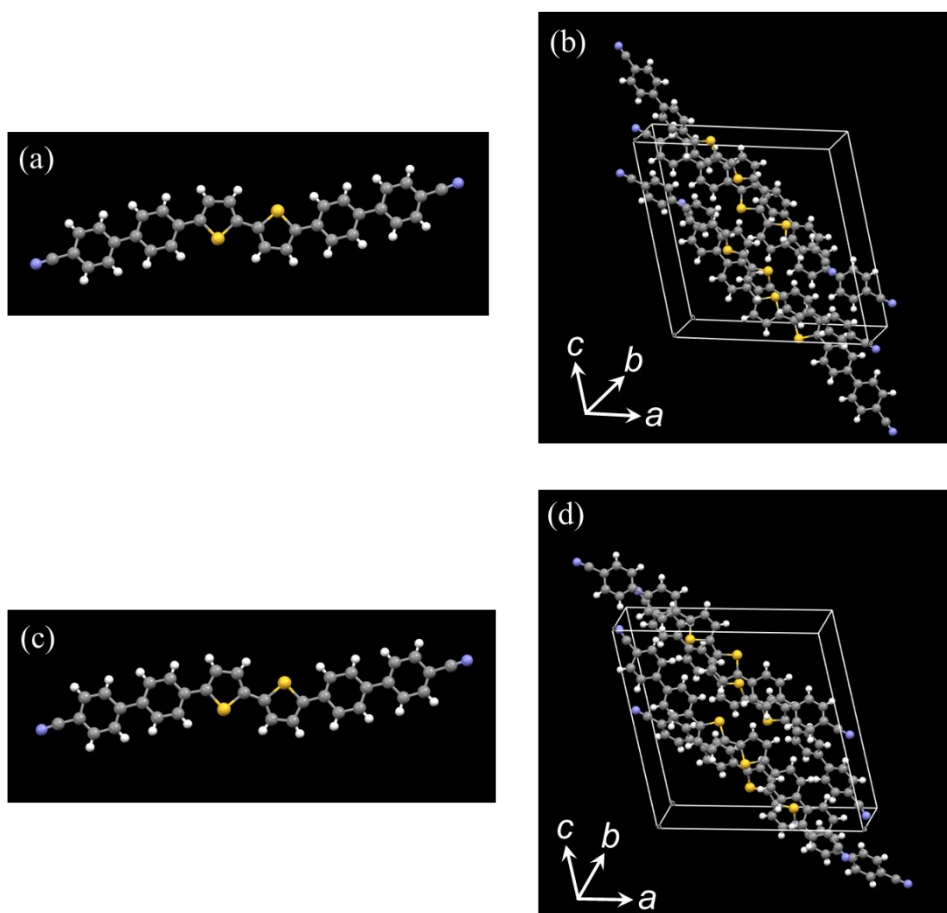

Figure S2. Molecular structures and crystal structures for orange- (a, b) and green-emitting crystals (c, d).

S3. Differential scanning calorimetry (DSC) purity analysis and thermogravimetry-differential thermal analysis (TG-DTA) for powder and crystals of BP2T-CN.

The van't Hoff plot (temperature versus reciprocal of the melt fraction ( $F$ )) for orange-emitting BP2T-CN crystals was obtained by differential scanning calorimetry (DSC) purity analysis (Figure S3(a)). The procedures of data analysis were based on the following literatures.<sup>1,2</sup> The purity  $P$  of orange-emitting BP2T-CN crystals was determined using the slope  $S_2$  of the data plots for after linearization (black closed circles) in Figure S3(a) and the following equation:

$$P = 100 \times \left( 1 + \frac{\Delta H_f \times S_2}{RT_0^2} \right)$$

, where  $R$ ,  $T_0$ , and  $\Delta H_f$  are gas constant, melting point of sample, and heat of melting obtained from total peak area  $\times$  (1+correction %), respectively. As a result of data analysis, the purity of the orange-emitting BP2T-CN crystals was determined to be 99.64 %.

Thermogravimetry-differential thermal analysis (TG-DTA) was also performed on a powder and crystals of BP2T-CN. The TG-DTA spectra for powder and crystals were shown in Figures S3(b) and S3(c). From the TG curves for powder and crystals, the materials were chemically stable up to approximately 450 °C without any noticeable weight loss. The first peaks at 320 °C (powder) and 319 °C (crystals) in DTA curves show the melting point of the materials. Decomposition temperatures were decided to be 484 °C (powder) and 482 °C (crystals) by gravimetric reduction points of TG-DTA curves, respectively. Therefore, since the decomposition does not occur under the crystal fabrication condition at ~360 °C using a gas burner, the orange emissions from the BP2T-CN crystals are attributed to smaller slip angle.

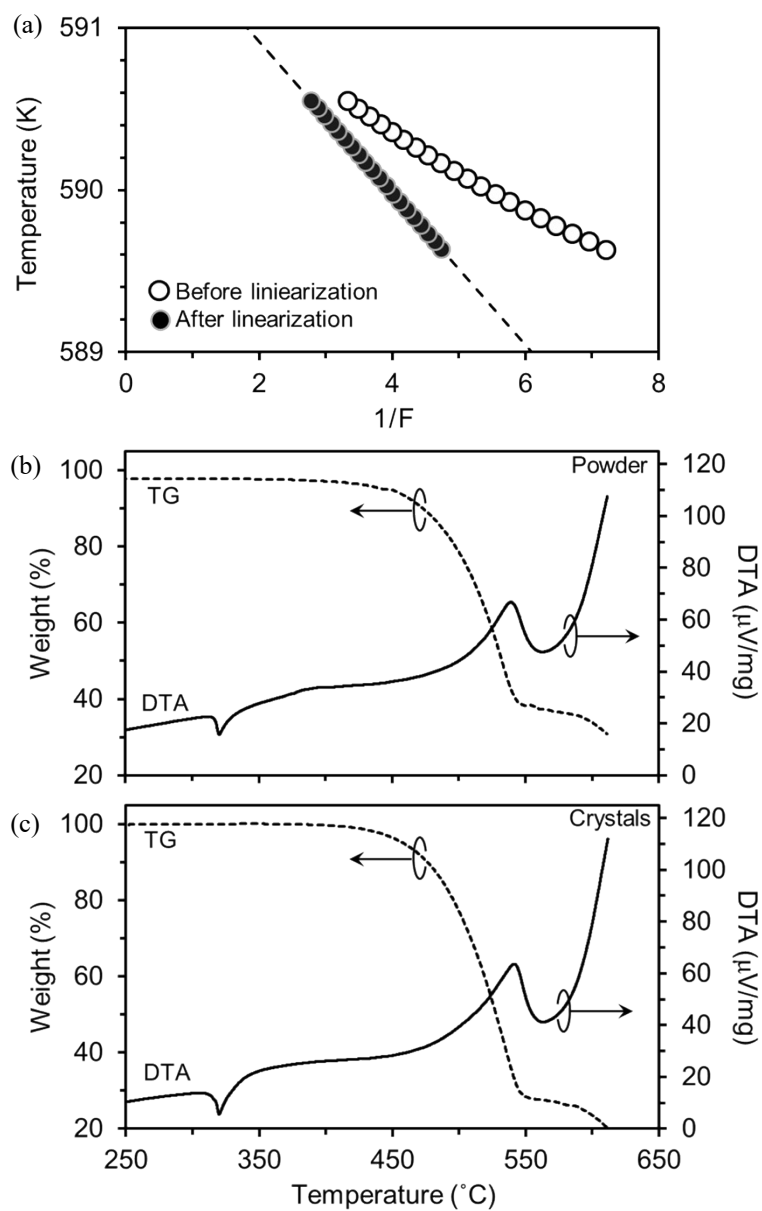

Figure S3. (a) DSC purity analysis for orange-emitting crystals. (b) The TG-DTA spectra for powder (b) and crystals

#### References

1. K. Yoshii, *Chem. Pharm. Bull.*, 1997, **45**, 338-343.
2. A. Książczak, T. Książczak and T. Zielenkiewicz, *J. Therm. Anal. Cal.*, 2004, **77**, 233–242.
